# Supplementary material for: Copy number variation analysis in Chinese children with complete atrioventricular canal and single ventricle
Source: BMC Med Genomics. 2021 Oct 9;14:243. doi: 10.1186/s12920-021-01090-y (PMC8502261; doi:10.1186/s12920-021-01090-y)
Supplement: Supplementary file 1 — Additional file 1. Table S1. Phenotypes of CHD cohort. [file 12920_2021_1090_MOESM1_ESM.xlsx]

## Sheet: Sheet1
Table S1, phenotypes of CHD cohort
CAVC ID	Sex	Date of birth	Type of CHD	SV ID	Sex	Date of birth	Type of CHD
CAVC001	Male	2016.8.18	CAVC, DORV, PS	SV001	Female	2005.04.27	SV, PA
CAVC002	Female	2009.11.24	CAVC, TOF	SV002	Male	2003.09.03	SV, SA, CAVC
CAVC003	Female	2009.2.27	CAVC, TOF	SV003	Male	2010.05.25	SV, SA, MGA
CAVC004	Female	2007.7.8	CAVC, DORV	SV004	Male	2007.5.1	SV, PA, SA
CAVC005	Male	2008.10.22	CAVC, DORV, PS	SV005	Female	2007.01.04	SV, MGA,
CAVC006	Male	2011.2.27	CAVC, TOF, ASD, PDA	SV007	Male	2001.01.21	SV, SA, PS
CAVC007	Female	2006.10.17	CAVC, DORV, TAPVC, PS	SV008	Female	2006.7.1	SV, TGA, PS
CAVC008	Female	2001.9.3	CAVC, D-TGA, VSD, PS	SV009	Female	2008.06.06	SV, SA, PS
CAVC009	Female	2008.5.25	CAVC, dextrocardia, DORV, ASD	SV010	Male	2007.3.1	SV, CAVC
CAVC010	Female	2011.2.3	CAVC, DORV, SA	SV011	Female	2011.05.04	SV, SA, TAPCD
CAVC011	Male	2015.4.2	CAVC, L-TGA, PS	SV012	Male	2008.11.13	SV, CAVC, PS
CAVC012	Female	2006.7.13	CAVC, DORV, PS, SA	SV013	Male	2006.07.11	SV, SA, CAVC
CAVC013	Male	2010.7.17	CAVC, DORV, PS, PFO	SV014	Male	2011.03.08	SV, TAPVD, PA
CAVC014	Male	2010.2.8	CAVC, DORV, PS, PDA	SV015	Male	2008.04.15	SV, VSD, ASD
CAVC015	Male	2010.5.19	CAVC, DORV, PS, SA	SV016	Male	2010.4.22	SV, PAPVC, CAVC
CAVC016	Female	2010.11.27	CAVC, TOF, ASD, PDA	SV017	Female	2009.4.5	SV, ASD, PDA
CAVC017	Male	2008.02.24	CAVC, DORV, S/P	SV018	Male	2008.06.19	SV, PS, CAVC
CAVC018	Male	2018.11.8	CAVC, DORV, PS	SV019	Female	2008.5.18	SV, dextrocardia, SA
CAVC019	Male	1998.9.1	CAVC, PDA, PA, VSD	SV020	Female	2007.12.26	SV, ASD, VSD
CAVC020	Female	2003.02.14	CAVC, DORV, PS	SV021	Male	2006.08.13	SV, ASD
CAVC021	Female	1997.12.20	CAVC, dextrocardia, DORV, PS	SV022	Female	2010.11.30	SV, PA, PDA
CAVC022	Male	2003.09.15	CAVC, DORV, VSD, PS	SV023	Female	2005.10.03	SV, MGA, PS
CAVC023	Male	2005.10.20	CAVC, S/P, MR	SV024	Male	2010.5.1	SV, D-TGA, VSD
CAVC024	Male	2012.04.24	CAVC, DORV, SA, PS	SV025	Male	2006.5.16	SV, MGA, PS
CAVC025	Male	2012.6.15	CAVC, SA, PH	SV026	Female	2010.12.20	SV, TAPVC, CAVC
CAVC026	Female	2009.11.28	CAVC, PH	SV027	Female	2009.10.23	SV, ASD, PS
CAVC027	Male	2009.05.15	CAVC, TOF, PAPVC	SV028	Female	2010.04.23	SV, TA, VSD
CAVC028	Male	2006.05.03	CAVC, dextrocardia, DORV	SV029	Female	2008.01.09	SV, PA, PS
CAVC029	Male	2011.10.09	CAVC, SA, PH,	SV030	Male	2008.01.10	SV, SA, PS
CAVC030	Male	2012.04.06	CAVC, dextrocardia, MGA,	SV031	Male	2008.10.04	SV, S/P, MGA
CAVC031	Male	2012.10.09	CAVC, DORV, TAPVC	SV032	Female	2010.09.24	SV, SA, TAPVC
CAVC032	Male	2011.10.10	CAVC, DORV, SA	SV033	Male	2011.11.21	SV, SA, CAVC, TAPVC
CAVC033	Male	2012.11.18	CAVC, PH	SV034	Female	2007.09.21	SV, SA, CAVC
CAVC034	Female	2010.05.01	CAVC, dextrocardia, SA	SV035	Male	2012.05.16	SV, TGA, ASD
CAVC035	Male	2012.10.29	CAVC, ASD, PDA	SV036	Male	2007.09.04	SV, PA, PDA
CAVC036	Male	2012.08.21	CAVC, dextrocardia, DORV	SV038	Male	2008.11.13	SA, SV, PS
CAVC037	Male	2010.05.01	CAVC, MR, PH,	SV039	Male	2001.04.28	SV, CAVC, PS
CAVC038	Male	2009.09.10	CAVC, DORV, dextrocardia	SV040	Female	2012.03.05	SV, TGA, PS
CAVC039	Male	2012.12.08	CAVC, ASD, PH	SV041	Male	2009.07.30	SV, S/P, MGA
CAVC040	Male	2012.07.07	CAVC, ASD, PAPVC	SV042	Male	2012.05.30	SV, SA, dextrocardia
CAVC041	Male	2012.09.28	CAVC, PH	SV043	Male	2005.05.02	SV, ASD, PS
CAVC042	Female	2012.12.28	CAVC, CoA, PH	SV044	Male	2008.6.22	SV , MGA PS, ,
CAVC043	Male	2012.10.30	CAVC, levocardia, L-TGA	SV045	Male	2007.03.03	SV, SA, PS
CAVC044	Male	2006.10.23	CAVC, PH	SV046	Female	2012.07.11	SV, DORV, SA
CAVC045	Female	2011.1.27	DORV, CAVC, SA	SV047	Male	2012.08.03	SV , CAVC PAPVC, PA SA
CAVC046	Male	2010.06.24	CAVC, DORV, dextrocardia	SV048	Female	2009.04.27	SV, SA, CAVC
CAVC047	Male	2011.12.23	CAVC, VSD, PFO	SV049	Male	2012.10.15	SV, dextrocardia, PA
CAVC048	Male	2013.11.18	CAVC, ASD, PFO	SV050	Male	2007.05.17	SV, SA, PS
CAVC049	Female	2013.10.12	CAVC, VSD, PFO	SV051	Female	2012.05.28	SV, SA, PAPVC
CAVC050	Male	2013.09.19	CAVC, ASD, VSD	SV052	Female	2008.12.04	SV, SA, TGA
CAVC051	Female	2014.01.15	CAVC, ASD, VSD	SV053	Male	2013.01.29	SV, PA, ASD
CAVC052	Male	2013.11.26	CAVC, PFO, PH	SV054	Female	2009.01.01	SV, SA, PS
CAVC053	Male	2013.12.26	CAVC, ASD, PDA	SV055	Male	2010.04.24	SV, MGA, TAPVC
CAVC054	Male	2010.09.06	CAVC, DORV, ASD	SV056	Female	2010.11.25	SV, MGA, MR
CAVC055	Female	2013.06.10	CAVC, ASD, PH	SV057	Male	2002.12.03	SV, TGA, PI
CAVC056	Female	2012.03.19	CAVC, PH	SV058	Female	2012.11.20	SV, SA , PA
CAVC057	Female	2014.02.11	CAVC, LSVC, PFO	SV059	Male	2012.05.23	SV, SA, PS
CAVC058	Male	2013.07.19	CAVC, DORV, SA	SV060	Male	2011.02.15	SV, SA, dextrocardia
CAVC059	Female	2013.03.14	CAVC, mesocardia, DORV	SV061	Male	2009.09.03	SV, SA, PS
CAVC060	Male	2010.12.15	CAVC, SA, DORV	SV062	Male	2011.12.03	SV, dextroversion of the heart, PA
CAVC061	Female	2013.04.26	CAVC, ASD, PDA	SV063	Male	2012.08.30	SV, PS, ASD
CAVC062	Male	2014.01.18	CAVC, PFO, PH	SV064	Male	2012.05.09	SV, MGA, PS
CAVC063	Female	2007.08.26	CAVC, MR(, TR	SV065	Male	2006.01.13	SV, MGA , ASD
CAVC064	Male	2011.12.11	CAVC, TOF, SA	SV066	Male	2012.10.17	SV, SA, MGA
CAVC065	Male	2013.12.24	CAVC, dextrocardia, DORV	SV067	Female	2000.11.13	SV, SA, PS
CAVC066	Male	2013.12.24	CAVC, AVVR, PH	SV068	Female	2013.07.05	SV, TGA, dextrocardia
CAVC067	Male	2014.03.01	CAVC, PA/VSD	SV069	Male	2012.09.02	SV, MGA, ASD
CAVC068	Female	2004.06.22	CAVC, MR, TR	SV070	Male	2011.01.24	SV, TGA, PS
CAVC069	Female	2013.12.14	CAVC, PH	SV071	Male	2009.10.20	SV, dextrocardia, TGA
CAVC070	Female	2014.05.23	CAVC, ASD, PFO	SV072	Female	2009.09.02	SV , PA , ASD
CAVC071	Male	2014.01.18	CAVC, ASD, PH	SV073	Female	2012.03.20	SV, PA, ASD
CAVC072	Male	2014.05.27	CAVC, PFO, ASD	SV074	Male	2011.08.01	SV, MGA, SA
CAVC073	Female	2014.06.19	CAVC, VSD, ASD	SV075	Female	2012.12.08	SV, MGA, PS
CAVC074	Female	2014.06.23	CoA, CAVC, ASD	SV076	Male	2011.01.09	SV, dextrocardia, MGA
CAVC075	Female	2013.10.16	CAVC, PH	SV077	Female	2010.11.11	SV, SA, PS
CAVC076	Female	2014.06.15	CAVC, ASD, AVVR	SV078	Female	2013.10.16	SV, SA, CAVC
CAVC077	Male	2012.10.06	CAVC, DORV, dextrocardia	SV079	Male	2013.08.17	SV, mesocardia, SA
CAVC078	Male	2014.06.04	CAVC, ASD, PFO	SV080	Male	2013.07.12	SV, TGA, PH
CAVC079	Female	2013.06.26	CAVC, SA, PA, PDA, cardiosplenic syndromes	SV081	Female	2010.10.29	SV, ASD,
CAVC080	Female	2014.07.13	CAVC, AVVR, PFO	SV082	Male	2013.08.23	SV, dextrocardia,
CAVC081	Female	2012.02.18	CAVC, RVOTO, PDA, ASD	SV083	Male	2013.10.19	SV, MGA, ASD
CAVC082	Female	2014.08.03	CAVC, PFO, PH,	SV084	Male	2013.09.13	SV, MGA, CAVC
CAVC083	Female	2009.08.06	CAVC, PDA, AVVR	SV085	Female	2010.12.26	SV, D-TGA, ASD
CAVC084	Male	2014.01.22	CAVC, ASD, AVVR	SV086	Male	2006.03.16	SV, SA, dextrocardia
CAVC085	Female	2014.03.21	CAVC, PFO, PH	SV087	Male	2009.06.23	SV, MGA, dextrocardia
CAVC086	Male	2014.07.04	CAVC, PFO, PS	SV088	Male	2013.08.14	SV, SA, dextrocardia
CAVC087	Male	2010.11.01	CAVC, bilateral right-sideness isomerism, TAPVC, PA/VSD,	SV089	Male	2011.03.12	SV, SA, MGA
CAVC088	Female	2014.04.20	CAVC, ASD, PH	SV090	Female	2004.02.21	SV, MGA, PS
CAVC089	Female	2014.04.15	CAVC, AVVR, PFO,	SV091	Male	2013.12.02	SV, D-TGA, PS
CAVC090	Male	2011.10.25	CAVC, dextrocardia, DORV	SV092	Female	2011.02.01	SV, MGA SA, , TAPVC
CAVC091	Female	2014.05.08	CAVC, PFO, PH	SV093	Male	2013.08.01	SV, MGA, PH
CAVC092	Female	2014.10.28	CAVC, ASD, PDA	SV094	Female	2008.12.24	SV, MGA, PS
CAVC093	Male	2014.07.10	CAVC, ASD, PDA	SV095	Female	2014.04.04	SV, MGA, PFO
CAVC094	Male	2014.07.01	CAVC, DORV, HLHAS	SV00+J10:J9597	Female	2010.01.28	SV, SA, dextrocardia
CAVC095	Female	2014.08.13	CAVC, AVVR	SV097	Female	2013.10.05	SV, MGA, SA
CAVC096	Female	2014.04.13	CAVC, ASD, VSD	SV098	Male	2013.10.23	SV, dextrocardia, MGA SA,
CAVC97	Male	2014.04.29	CAVC, dextrocardia, bilateral right-sideness isomerism, DORV, PS	SV099	Male	2008.09.27	SV, dextrocardia, ASD
CAVC98	Male	2014.10.24	CAVC, AVVR, PFO	SV100	Male	2006.04.08	SV, D-TGA, PS
CAVC99	Male	2014.07.20	CAVC, ASD, PH	SV101	Male	2010.01.08	SV, bilateral right-sideness isomerism, MGA SA,
CAVC100	Male	2014.09.20	CAVC, congenital spleen hypoplasia, bilateral right-sideness isomerism, AVVR	SV103	Male	2013.10.29	SV, dextrocardia, ASD
CAVC101	Female	2014.09.28	CAVC, AVVR, PFO	SV105	Male	2009.06.16	SV, dextrocardia, ASD
CAVC102	Female	2014.09.09	CAVC, PDA, PFO	SV106	Female	2014.05.07	SV, MGA, Mitral insufficiency
CAVC103	Female	2014.08.15	CAVC, ASD, PDA	SV107	Female	2014.02.09	SV, MGA SA, , CAVC
CAVC104	Male	2014.11.05	CAVC, ASD, PDA	SV108	Female	2014.02.26	SV, dextrocardia, PA/IVS
CAVC105	Male	2011.07.14	CAVC, TOF	SV109	Male	2014.04.02	SV, mesocardia, PA/VSD
CAVC106	Female	2014.08.19	CAVC, AVVR, PH	SV110	Male	2014.03.05	SV, TAPVC SA, , MGA
CAVC107	Female	2014.08.15	CAVC, PS	SV111	Female	2005.04.23	SV, PS SA,
CAVC108	Female	2014.07.21	CAVC ASD, PH	SV112	Male	2014.06.24	SV, ASD, MGA
CAVC109	Female	2014.08.13	CAVC, LPVS, PH	SV113	Female	2013.07.22	SV, MGA SA, TAPVC
CAVC110	Female	2014.07.10	TOF, CAVC, ASD	SV114	Male	2004.08.19	SV, MGA SA, CAVC
CAVC111	Female	2014.11.19	CAVC, ASD, PH	SV115	Female	2011.08.24	SV, MGA , SA, PS
CAVC112	Female	2014.07.19	CAVC, DORV, AVVR, SA,	SV116	Female	2011.11.12	SV, MGA, PS
CAVC113	Female	2014.12.26	CAVC, ASD, PH	SV117	Male	2011.11.27	SV, D-TGA, MR
CAVC114	Male	2014.08.16	CAVC, DORV, PS	SV118	Female	2012.08.24	SA, SV, bilateral right-sideness isomerism, mesocardia
CAVC115	Female	2014.11.29	CAVC, ASD, AVVR	SV119	Male	2012.02.05	SV, SA, bilateral right-sideness isomerism, dextrocardia, MGA
CAVC116	Female	2013.11.09	CAVC, bilateral right-sideness isomerism, DORV, SA,	SV120	Male	2011.07.20	SV, bilateral right-sideness isomerism, MGA, PS SA
CAVC117	Female	2014.11.18	CAVC, ASD, PS	SV121	Male	2011.02.03	SV, MGA , SA, PS
CAVC118	Female	2014.12.01	CAVC, AVVR, ASD	SV122	Male	2014.08.07	SV, endocardial cushion defect, MGA
CAVC119	Female	2014.11.26	CAVC, PFO	SV123	Male	2014.03.18	SV, PA, ASD
CAVC120	Female	2014.10.18	CAVC, PFO, PH	SV124	Male	2014.07.30	SV, PA, ASD
CAVC121	Male	2004.05.27	CAVC, PA, PDA	SV125	Female	2011.05.25	SA, SV, bilateral right-sideness isomerism, MGA, PS
CAVC122	Male	2015.04.04	CAVC, AVVR PFO	SV126	Male	2014.05.23	SV, PS , SA, MGA
CAVC123	Male	2014.02.22	CAVC, ASD, PH	SV127	Female	2013.09.26	SV, MGA SA, , PS
CAVC124	Male	2014.11.02	DORV, CAVC, AVVR, SA	SV128	Male	2013.11.01	SV, MGA, ASD
CAVC125	Female	2014.11.01	CAVC, AVVR, PH	SV129	Male	2014.02.15	SV, bilateral right-sideness isomerism, PA, PDA
CAVC126	Female	2015.01.28	CAVC, AVVR, PFO	SV130	Female	2004.07.18	SV, dextrocardia
CAVC127	Female	2007.05.13	CAVC, PH	SV131	Male	2014.05.10	SV, MGA
CAVC195	Female	2008.06.12	CAVC, MS, MR	SV132	Male	2014.02.08	SV, MGA
CAVC129	Male	2015.02.26	CAVC, PFO, PH	SV133	Female	2014.10.22	SV, bilateral right-sideness isomerism, PA
CAVC130	Female	2001.11.21	CAVC, PDA	SV134	Male	2010.04.10	SV, bilateral right-sideness isomerism, ASD
CAVC131	Female	2005.03.16	CAVC, dextrocardia, SA, TGA	SV135	Male	2003.01.02	SV, SA, DORV, CAVC
CAVC132	Male	2014.03.20	CAVC, PFO, PH	SV136	Male	2011.05.05	SV, MGA, PS
CAVC133	Female	2014.11.13	CAVC, PH	SV137	Male	2014.01.29	SV, PA, MGA, ASD
CAVC134	Male	2015.01.13	CAVC, AVVR, ASD	SV138	Male	2014.05.28	SV, MGA, CAVC
CAVC135	Female	2015.04.28	CAVC, AVVR, ASD	SV139	Female	2010.04.26	SV, MGA SA, CAVC
CAVC136	Male	2015.04.07	CAVC, PFO, PH	SV140	Male	2009.10.31	SV, MGA, ASD
CAVC137	Female	2015.03.27	CAVC, ASD, PDA	SV141	Female	2010.06.17	SV, ASD
CAVC138	Female	2014.10.01	CAVC, AVVR, PFO	SV142	Male	2014.06.03	SV, TGA, VSD
CAVC139	Female	2015.04.23	CAVC, PFO, PH	SV143	Male	2014.02.07	SV, SA, MGA
CAVC140	Female	2005.07.26	CAVC, L-TGA, VSD	SV144	Male	2014.10.17	SV, PA SA
CAVC141	Male	2009.07.08	CAVC, AVVR, PS	SV145	Female	2013.01.04	SV, dextrocardia, CAVC
CAVC142	Male	2015.03.30	CAVC, ASD, PFO	SV146	Male	2014.09.08	SV, PFO, MGA
CAVC143	Female	2012.05.30	CAVC, bilateral right-sideness isomerism, DORV	SV147	Female	2009.02.19	SV, SA, ASD
CAVC144	Female	2015.04.26	CAVC, ASD, PFO	SV148	Female	2009.01.04	SV, bilateral right-sideness isomerism, MGA
CAVC145	Female	2015.06.01	CAVC, PDA, PH	SV149	Male	2009.12.26	SV, bilateral right-sideness isomerism, MGA
CAVC146	Male	2011.09.05	CAVC, AVVR	SV150	Female	2010.09.09	SV, dextrocardia, MGA
CAVC147	Male	2015.04.03	CAVC, ASD, PDA,	SV151	Male	2012.02.12	SV, mesocardia, bilateral right-sideness isomerism, MGA, PA
CAVC148	Male	2015.10.31	CAVC, SA, PA/VSD, bilateral right-sideness isomerism	SV152	Female	2012.06.22	SV, bilateral right-sideness isomerism, MGA
CAVC149	Male	2015.06.13	CAVC, DORV, TAPVC , SA,	SV153	Male	2011.10.24	SV, DORV, bilateral right-sideness isomerism, AAVR
CAVC150	Male	2015.06.01	CAVC, DORV, VSD	SV154	Female	2014.09.16	SV, dextrocardia, ASD
CAVC151	Male	2014.11.05	DORV, SA, CAVC, VSD	SV155	Male	2014.10.18	SV, dextrocardia, PA
CAVC152	Male	2015.07.05	CAVC, MR, PH	SV156	Female	2014.02.17	SV, dextrocardia, MGA
CAVC153	Male	2015.08.04	CAVC, PFO, PH	SV157	Female	2007.04.01	SV, MGA, ASD
CAVC154	Male	2015.09.18	CAVC, AVVR, PFO, PH,	SV158	Female	2012.03.09	SV, MGA, PS
CAVC155	Male	2013.07.21	CAVC, PFO, PH,	SV159	Male	2014.07.02	SV, TAPVC, MGA
CAVC156	Male	2015.07.08	CAVC, AAVR, PH	SV160	Female	2014.01.20	SV, dextrocardia, PA
CAVC157	Male	2013.01.18	CAVC, AAVR, PFO, PH	SV161	Male	2014.08.26	SV, PA/VSD, ASD
CAVC158	Male	2011.06.01	CAVC, AAVR, PH	SV162	Male	2001.10.06	SV, cardiac-splenic syndrome, PA, TAPVC, CAVC
CAVC159	Male	2013.03.20	CAVC, PDA, PH	SV163	Male	2012.05.24	SV, TGA, CoA
CAVC160	Male	2015.09.03	CAVC, AAVR, PDA	SV164	Female	2012.03.25	SV, D-TGA, VSD, ASD
CAVC161	Female	2004.06.23	CAVC, PH, ,	SV165	Female	2012.10.02	SV, SA, , CAVC
CAVC162	Male	2002.04.16	CAVC, DORV AAVR	SV166	Male	2014.11.11	SV, SA, MGA
CAVC163	Male	2015.03.07	CAVC, AAVR, PH,	SV167	Male	2011.03.22	SV, MGA, PS
CAVC164	Male	2015.06.23	CAVC, PFO, PH,	SV168	Female	2008.02.15	SV, ASD , PA, PDA
CAVC165	Male	2015.07.15	CAVC, AAVR, PFO	SV169	Female	2013.12.01	SV, MGA, PS
CAVC166	Female	2011.07.12	CAVC, MR, PFO	SV170	Female	2005.04.19	SV, MGA, PS
CAVC167	Female	2015.07.31	CAVC, DORV, AAVR	SV171	Female	2005.02.07	SV, , SA, MGA
CAVC168	Female	2015.01.10	CAVC, ASD, PH	SV172	Male	2014.11.15	SV, MGA, PS
CAVC169	Male	2015.08.30	CAVC, DORV, PS	SV173	Female	2011.06.01	SV, , SA, MGA
CAVC170	Female	2011.10.29	CAVC, TOF, ASD	SV174	Male	2015.08.05	SV, TGA, CoA, ASD
CAVC171	Female	2015.11.21	CAVC, AAVR, PFO	SV175	Male	2015.09.05	SV, SA, PS
CAVC172	Male	2014.12.10	CAVC, ASD, PH	SV176	Male	2011.08.30	SV, VSD, PS
CAVC173	Male	2016.01.11	CAVC, ASD, PH	SV177	Male	2006.10.30	SV, MGA,
CAVC174	Female	2016.01.18	CAVC, ASD, PH	SV178	Male	2008.09.25	SV, MGA, PS
CAVC175	Male	2013.08.19	CAVC, polysplenia Syndrome, CoA, PS, SA	SV179	Female	2013.06.21	SV, SA, , MGA
CAVC176	Male	2015.12.05	CAVC, PFO, PH	SV180	Female	2012.07.14	SV, SADORV(I.D.D), PS
CAVC177	Male	2014.03.06	CAVC, dextrocardia, SA, PA, PDA,	SV181	Male	2012.07.22	SV, ASD
CAVC178	Female	2014.09.18	CAVC, bilateral right-sideness isomerism, SA, PA,	SV182	Male	2000.09.01	SV, CAVC, DORV
CAVC179	Male	2016.03.08	dextrocardia, SA, D-TGA, CAVC, PH,	SV183	Female	2015.03.11	SV, MGA, PA, SA,
CAVC180	Female	2016.04.07	CAVC, ASD, ,	SV184	Male	2010.06.19	SV, PA, ASD, PDA
CAVC181	Female	2016.01.02	CAVC, ASD, PH,	SV185	Male	2007.09.22	SV, MGA, PS
CAVC182	Female	2014.02.28	CAVC, ASD, PH,	SV186	Male	2009.04.26	SV, MGA, AAVR
CAVC183	Female	2004.12.29	CAVC, dextrocardia, DORV, PS,	SV187	Female	2010.04.24	SV, , MGA, AAVR
CAVC184	Female	2013.07.10	CAVC, dextrocardia, bilateral right-sideness isomerism, SA, DORV, TAPVC	SV188	Female	2016.02.05	SV, D-TGA, PDA
CAVC185	Female	2016.01.20	CAVC, PFO	SV189	Male	2014.08.25	SV, MGA, AAVR
CAVC186	Female	2015.11.26	CAVC, ASD, PH	SV190	Female	2011.05.20	SV, TGA, CoA
CAVC187	Male	2015.11.07	DORV, SA, CAVC, PS	SV191	Female	2005.06.08	SV, CAVC, PS
CAVC188	Female	2016.01.15	CAVC, AAVR, PH	SV192	Female	2015.11.11	SV, MGA, PFO
CAVC189	Male	2016.05.10	CAVC, bilateral right-sideness isomerism, SA, TAPVC	SV193	Male	2011.10.20	SV, MGA, PS
CAVC190	Female	2016.04.09	CAVC, ASD, PFO, PS	SV194	Male	2012.06.01	SV, PA, PDA
CAVC191	Male	2016.02.29	CAVC, AAVR, PFO	SV195	Male	2015.05.01	SV, , SA, MGA, PS
CAVC192	Female	2016.04.10	CAVC, ASD, PDA	SV196	Male	2015.09.26	SV, ASD, PS , MGA
CAVC196	Female	2016.03.29	CAVC, AAVR, PS	SV197	Male	2015.04.16	SV, MGA, TAPVC,
CAVC197	Female	2010.12.19	CAVC, PH	SV198	Male	2013.07.15	SV, SV, MGA, CAVC, PS
CAVC198	Female	2016.05.06	CAVC, PFO, PH	SV199	Male	2015.12.01	SV, PA, PDA
CAVC199	Female	2012.07.09	CAVC, ASD, PH	SV200	Female	2006.04.08	SV, CAVC, ASD
CAVC200	Female	2015.11.10	CAVC, DORV, PS, SA	SV201	Female	2010.10.30	SV, MGA, PS
CAVC201	Female	2016.04.25	CAVC, ASD, AAVR,	SV202	Male	2014.12.28	SV, MGA, PS
CAVC202	Male	2015.12.17	CAVC, ASD, AAVR	SV203	Male	2011.06.17	SV, MGA, ASD
CAVC203	Female	2016.02.21	TOF, CAVC, ASD	SV204	Female	2012.10.06	SV, MGA, ASD
CAVC204	Female	2015.07.01	TOF, CAVC, PFO	SV205	Male	2004.05.04	SV, MGA, PS
CAVC206	Male	2016.01.19	CAVC, ASD, PH	SV206	Female	2013.11.20	SV, SA, MGA
CAVC207	Female	2016.06.09	CAVC, ASD, AAVR	SV207	Male	2016.01.29	SV, MGA, ASD
CAVC208	Male	2016.05.22	CAVC, AAVR, PH,	SV208	Female	2016.02.20	SV, MGA, CAVC, PS
CAVC209	Female	2011.01.11	dextrocardia, SA, DORV, CAVC	SV209	Male	2013.09.09	SV, MGA, PS
CAVC210	Female	2016.07.18	CAVC, AAVR, ASD	SV210	Male	2015.09.15	SV, MGA, ASD
CAVC211	Male	2003.12.20	TOF, CAV	SV211	Female	2016.02.01	SV, MGA, PFO
CAVC212	Female	2015.03.08	CAVC, VSD, AAVR	SV212	Male	2010.11.26	SV, MGA, ASD
CAVC213	Female	2014.03.15	Cardio-splenic syndrome, DORV, SA, CAVC, VSD, PS,	SV213	Female	2015.11.27	SV, MGA, TAPVC, CAVC
CAVC214	Female	2013.08.02	CAVC, AAVR, PFO,	SV214	Female	2011.08.15	SV, TAPVC, CAVC
CAVC215	Female	2014.05.02	CAVC, ASD, AAVR	SV215	Male	2015.07.08	SV, SA, SV, MGA
CAVC216	Male	2016.10.08	CAVC, ASD, AAVR,	SV216	Female	2016.07.20	SV, MGA, ASD
CAVC217	Female	2008.12.12	CAVC, ASD, AAVR,	SV217	Female	2015.03.01	SV, MGA, PS
CAVC219	Female	2016.08.04	CAVC, ASD, AAVR,	SV218	Female	2015.09.25	SV, TAPVC, MGA, CAVC
CAVC220	Female	2016.09.20	CAVC, LSVC, PH,	SV219	Female	2016.01.14	SV, MGA, PS
CAVC221	Male	2016.09.17	CAVC, ASD, AAVR,	SV220	Male	2016.02.20	SV, SA, , MGA
CAVC222	Male	2016.11.13	CAVC, ASD, PFO,	SV221	Male	2012.04.26	SV, MGA, CAVC
CAVC223	Male	2016.11.29	CAVC, ASD, PDA,	SV222	Male	2011.01.25	SV, SA, MGA
CAVC224	Female	2016.11.02	CAVC, AAVR, PFO,	SV223	Female	2016.06.24	SV, ASD
CAVC225	Male	2014.07.04	TOF, CAVC, ASD,	SV224	Male	2016.06.29	SV, MGA, ASD, PH
CAVC226	Female	2016.10.29	CAVC, ASD, AAVR,	SV225	Female	2012.10.07	SV, MGA, PS
CAVC227	Male	2017.02.26	DORV, CAVC, SA, PDA,	SV226	Female	2015.05.06	SV, MGA, AAVR
CAVC228	Male	2015.11.02	Cardio-splenic syndrome, DORV, CAVC, ASD	SV227	Female	2016.01.15	SV, DORV, VSD, PDA
CAVC229	Male	2016.10.24	CAVC, ASD, AAVR	SV228	Male	2016.11.25	DORV, SV, CAVC, PFO
CAVC230	Female	2016.11.23	CAVC, PH	SV229	Female	2013.11.08	SV, SA, , MGA, PS
CAVC231	Male	2017.03.11	D-TGA, CAVC	SV230	Male	2013.02.22	SV, DORV, VSD, PS, PFO, PDA
CAVC232	Male	2016.02.25	CAVC, ASD, AAVR	SV231	Male	2016.10.04	SV, MGA, TAPVC, ASD
CAVC233	Female	2016.10.07	CAVC, PFO, ,	SV232	Female	2010.05.11	SV, DORV, VSD, ASD
CAVC234	Male	2016.07.17	DORV, CAVC, ASD, AAVR	SV233	Male	2016.02.06	SV, MGA, ASD
CAVC235	Male	2015.02.21	CAVC, AAVR, PDA, ,	SV234	Female	2012.08.06	SV, MGA, PS
CAVC236	Female	2011.11.06	DORV, CAVC, SA,	SV235	Male	2016.03.29	SV, SA, SV,
CAVC237	Female	2016.01.14	CAVC, PH, ,	SV236	Male	2016.07.21	SV, SA, SV, MGA, CAVC
CAVC238	Male	2013.02.02	TOF, SA, CAVC, VSD,	SV237	Male	2017.02.05	SV, PA/VSD, ASD, PDA, PFO
CAVC239	Female	2016.11.14	CAVC, ASD, ,	SV238	Male	2017.03.22	SV, SA, , MGA, TAPVC
CAVC240	Male	2007.11.29	CAVC, bilateral right-sideness isomerism, SA, DORV, PA/VSD	SV239	Male	2015.08.30	SV, , SA, MGA, PS
CAVC241	Male	2017.03.03	CAVC, ASD, AAVR,	SV240	Male	2012.05.31	SV, MGA, PS
CAVC242	Female	2017.02.08	CAVC, ASD, PH	SV241	Female	2010.08.05	SV, ASD PA, PDA
CAVC245	Female	2017.03.27	CAVC, ASD, AAVR	SV242	Male	2016.12.10	SA, SV, PA, TAPVC
CAVC246	Male	2016.01.16	dextrocardia, bilateral right-sideness isomerism, CAVC, DORV, TAPVC, PS	SV243	Female	2014.02.09	SA, SV, MGA, TAPVC, PS
CAVC247	Female	2016.09.23	CAVC, AAVR, PH,	SV244	Female	2016.02.28	SV, PA, ASD
CAVC248	Female	2016.05.16	CAVC, AAVR, ASD, PH,	SV245	Male	2015.05.05	SV, MGA, PS,
CAVC249	Female	2015.11.17	DORV, CAVC, PDA, PS,	SV246	Male	2005.05.16	SV, MGA, PS
CAVC250	Female	2017.02.16	TOF, CAVC, PDA, ,	SV247	Female	2016.12.11	, SV, PA, ASD
CAVC251	Female	2017.02.22	CAVC, ASD, AAVR, PS,	SV248	Male	2005.11.26	SV, PS, PFO
CAVC252	Male	2017.07.04	CAVC, ASD, AAVR	SV249	Female	2017.04.21	SV, PA/VSD, TAPVC
CAVC253	Male	2015.06.27	CAVC, ASD, PH,	SV250	Female	2012.03.18	SV, DORV, ASD, PDA
CAVC254	Male	2017.06.21	CAVC, AAVR, PDA,	SV251	Female	2017.03.07	SV, MGA, VSD, PH
CAVC255	Male	2014.05.01	DORV CAVC, ASD,	SV252	Male	2016.10.17	SV, MGA, CoA, PH
CAVC256	Male	2016.06.24	CAVC, AAVR, ASD,	SV253	Male	2017.04.24	SV, MGA, PS
CAVC257	Female	2017.05.11	CAVC, PH, ,	SV254	Female	2017.07.03	SV, PA, PDA
CAVC258	Female	2017.03.29	CAVC, AAVR, PFO,	SV255	Female	2017.05.04	SV, , MGA, PA, ASD
CAVC259	Male	2017.03.12	CAVC, ASD, PH,	SV256	Female	2000.04.20	SV, CAVC, PS
CAVC260	Female	2015.06.14	CAVC, PS, PDA,	SV257	Male	2012.05.30	SV, MGA, PS
CAVC261	Male	2018.06.19	CAVC, PH, ,	SV258	Female	2017.07.14	SV, MGA, ASD
CAVC262	Male	2018.07.12	CAVC, AAVR, PDA, PFO,	SV259	Female	2012.04.23	SV, PA, PDA
CAVC263	Female	2013.12.29	CAVC, ASD, MR, TR	SV260	Male	2017.04.20	SV, TAPVC, CAVC, MGA, PA, ASD
CAVC264	Female	2017.05.14	CAVC, ASD, PH,	SV261	Female	2016.08.24	SV, CAVC, MGA, PS
CAVC268	Male	2016.04.27	CAVC, PDA, PFO,	SV262	Male	2018.12.04	SV, MGA, TAPVC, PS
CAVC270	Male	2018.09.19	CAVC, AAVR PH,	SV263	Male	2018.06.24	SV, ASD, PS
CAVC271	Female	2018.05.01	CAVC, ASD, PH,	SV264	Male	2018.12.23	SV, PA, TAPVC, ASD
CAVC272	Female	2016.12.09	DORV, CAVC, PDA,	SV265	Female	2012.12.05	SV, , SA, MGA, CAVC
CAVC273	Female	2018.09.20	CoA, PDA, CAVC, SA, PH	SV266	Female	2018.09.07	SV, PA/VSD, PDA
CAVC274	Female	2018.08.31	CAVC, PFO	SV267	Female	2013.10.17	SV, , PDA
CAVC278	Male	2018.09.01	CAVC, PH	SV268	Male	2019.03.04	SV, DORV, PDA
The ones highlighted with red color failed the QC tests.
